# Supplementary material
Source: PubMed Central journal article supplement (PMC5459480)
Supplement: NIHMS860424-supplement-Supp1.pdf [file NIHMS860424-supplement-Supp1.pdf]

Supporting Information

Separation, sizing, and quantitation of engineered  
nanoparticles in an organism model using  
inductively coupled plasma mass spectrometry and  
image analysis

*Monique E. Johnson,<sup>†</sup> Shannon K. Hanna,<sup>‡</sup> Antonio R. Montoro Bustos,<sup>†</sup> Christopher M. Sims,<sup>‡</sup>  
Lindsay C. C. Elliott,<sup>||</sup> Akshay Lingayat,<sup>£</sup> Adrian C. Johnston,<sup>£</sup> Babak Nikoobakht,<sup>||</sup> John T.  
Elliott,<sup>‡</sup> R. David Holbrook,<sup>||</sup> Keana C. K. Scott,<sup>||</sup> Karen E. Murphy,<sup>†</sup> Elijah J. Petersen,<sup>‡</sup> Lee L.  
Yu,<sup>†</sup> and Bryant C. Nelson<sup>‡</sup>*

<sup>†</sup>Chemical Sciences Division, <sup>‡</sup>Biosystems and Biomaterials Division, and <sup>||</sup>Materials  
Measurement Sciences Division, Material Measurement Laboratory, National Institute of  
Standards and Technology, Gaithersburg, Maryland 20899, United States

<sup>£</sup>The University of Maryland, College Park, Maryland 20742, United States

**Optimization of TMAH digestion of AuNPs and biological tissue.** An organic base digestion was performed using tetramethylammonium hydroxide (TMAH). Following a quantitative extraction of intact AuNPs in the presence of dried nematodes, digestion concentrations were initially tested in terms of base strength and digestion efficiency. Concentrations of 1 %, 3 %, 5 %, 7 %, and 10 % (w/w) were assessed for the optimal digestion concentration. A 1 mL portion of each concentration was added to 0.5 mg of dry, unexposed nematodes, vortexed for 30 s, and left to react  $\geq 2$  h. After the digestion period, the samples were observed under an optical microscope. A successful and complete digestion of nematode samples, denoted by a clear digest with no visible nematode debris, was obtained for the 7 % and 10 % (w/w) TMAH concentrations. Afterwards, in a parallel experiment, 30 nm and 60 nm AuNPs (NIST) were also digested with 7 % and 10 % (w/w) TMAH and then analyzed by spICP-MS. spICP-MS measurements of both the 7 % and 10 % (w/w) TMAH AuNP digests showed an elevated dissolved Au signal and a loss of 85 % of the expected particle events. This digestion strategy was not suitable for AuNPs as this base concentration did not keep AuNPs intact without the presence of biological material. Therefore, an alternate strategy for validation was employed. Using the calculations found in the total Au experiments and keeping in mind that the optimal desired spICP-MS particle number concentration was 15,000 particles/mL, we adjusted the base digestion strategy to a TMAH concentration of 0.07 % (w/w) for the digestion of AuNPs absent nematode tissue. We then investigated whether there was any transformation of the AuNPs by TMAH by monitoring the background signal, the accuracy of size analysis, and the recovery for the AuNPs. The background signal remained low, the size distributions were in agreement with TEM values found in the reports of investigation, and a quantitative recovery for AuNPs of both sizes was obtained. Therefore, the 0.07 % (w/w) and 7 % TMAH (w/w) concentrations were selected as the most appropriate TMAH digestion concentrations for AuNPs and *C. elegans* tissue, respectively.

**Equations for the estimation of cuticle adsorbed AuNPs and ingested AuNPs per *C. elegans*.**

$$C_{Au} = \frac{V_{AuNP} * \rho_{Au} * N_{C. elegans}}{m_{C. elegans}} \quad (1)$$

$C_{Au}$  = the concentration of Au per *C. elegans* (w/w) as determined by ICP-MS and expressed as in ng per g *C. elegans*

$V_{AuNP}$  = the volume of the exposure AuNP

$\rho_{Au}$  = density of gold in g/cm<sup>3</sup>

$N_{C. elegans}$  = the number of particles associated with the dry *C. elegans* pellet in particles per g *C. elegans*

$m_{C. elegans}$  = approximated mass of 1 *C. elegans*, estimated as the average mass of the dry nematode pellet, in g, in the control experiment divided by a 100,000 nematode exposure population (average number of *C. elegans* per exposure replicate,  $\approx 1.65 \times 10^{-8}$  g)

Rearranging eq. (1), the number of particles associated with the dry *C. elegans* pellet is then,

$$N_{C. elegans} = \frac{C_{Au} * m_{C. elegans}}{V_{AuNP} * \rho_{Au}} \quad (2)$$

The volume of a spherical particle,  $V_{AuNP}$ , is presented as:

$$V_{AuNPs} = \left(\frac{4}{3}\right)\pi(d/2)^3 \rho_{Au} \quad (3)$$

where  $d$  = the TEM diameter of the nanoparticle. Substituting eq. (3) into eq. (2) gives:

$$N_{C. elegans} = \frac{6 * C_{Au} * m_{C. elegans}}{\pi d^3 \rho_{Au}} \quad (4)$$

**Table S1. Relative % Au found in gradient layers following centrifugation of a mixture of 30 nm and 60 nm AuNPs (NIST) at 100 ng mL<sup>-1</sup>.**

| <b>Gradient Layer</b> | <b>Relative % Au</b> |                 |                 |                 |
|-----------------------|----------------------|-----------------|-----------------|-----------------|
|                       | <b>Sample 1</b>      | <b>Sample 2</b> | <b>Sample 3</b> | <b>Sample 4</b> |
| 13                    | 23.8                 | 23.0            | 20.9            | 20.1            |
| 12                    | 20.3                 | 21.3            | 20.7            | 21.5            |
| 11                    | 18.7                 | 19.0            | 19.8            | 20.4            |
| 10                    | 16.3                 | 18.1            | 18.5            | 18.4            |
| 9                     | 8.8                  | 7.3             | 7.9             | 7.9             |
| 8                     | 3.6                  | 3.3             | 3.6             | 3.5             |
| 7                     | 2.5                  | 2.4             | 2.7             | 3.0             |
| 6                     | 1.6                  | 1.5             | 1.7             | 1.6             |
| 5                     | 0.9                  | 1.0             | 0.8             | 0.9             |
| 4                     | 0.8                  | 0.7             | 0.8             | 0.6             |
| 3                     | 0.6                  | 0.6             | 0.8             | 0.5             |
| 2                     | 0.5                  | 0.6             | 0.6             | 0.2             |
| 1                     | 1.5                  | 1.2             | 1.1             | 1.4             |

**Table S2. Relative % Au found in gradient layers following a 0 h nematode exposure to a mixture of 30 nm and 60 nm AuNPs (NIST) at 100 ng mL<sup>-1</sup>. \*Indicates the location of nematodes within the gradient after centrifugation.**

| <b>Gradient Layer</b> | <b>Relative % Au</b> |                 |                 |                 |
|-----------------------|----------------------|-----------------|-----------------|-----------------|
|                       | <b>Sample 1</b>      | <b>Sample 2</b> | <b>Sample 3</b> | <b>Sample 4</b> |
| 13                    | 23.5                 | 18.7            | 18.2            | 17.9            |
| 12                    | 23.6                 | 24.8            | 27.3            | 26.8            |
| 11                    | 20.7                 | 20.3            | 23.8            | 21.5            |
| 10                    | 15.9                 | 18.1            | 17.8            | 17.8            |
| 9                     | 6.8                  | 8.2             | 5.3             | 7.4             |
| 8                     | 2.9                  | 3.3             | 2.6             | 3.0             |
| 7                     | 2.2                  | 2.3             | 1.7             | 1.9             |
| 6*                    | 1.6                  | 2.1             | 1.6             | 1.8             |
| 5*                    | 0.9                  | 0.5             | 0.5             | 0.4             |
| 4*                    | 0.6                  | 0.4             | 0.2             | 0.3             |
| 3                     | 0.4                  | 0.4             | 0.4             | 0.3             |
| 2                     | 0.4                  | 0.3             | 0.2             | 0.3             |
| 1                     | 0.6                  | 0.7             | 0.3             | 0.7             |

**Table S3. Relative % Au found in gradient layers following a 24 h nematode exposure to 60 nm AuNPs (NIST) at 333 ng mL<sup>-1</sup>. \*Indicates the location of nematodes within the gradient after centrifugation.**

| <b>Gradient Layer</b> | <b>Relative % Au</b> |                 |                 |
|-----------------------|----------------------|-----------------|-----------------|
|                       | <b>Sample 1</b>      | <b>Sample 2</b> | <b>Sample 3</b> |
| <b>13</b>             | <b>28.5</b>          | <b>27.3</b>     | <b>26.2</b>     |
| <b>12</b>             | <b>24.8</b>          | <b>25.4</b>     | <b>25.8</b>     |
| <b>11</b>             | <b>21.4</b>          | <b>20.9</b>     | <b>21.6</b>     |
| <b>10</b>             | <b>14.0</b>          | <b>15.4</b>     | <b>17.2</b>     |
| <b>9</b>              | <b>7.3</b>           | <b>7.2</b>      | <b>5.7</b>      |
| <b>8*</b>             | <b>1.6</b>           | <b>1.3</b>      | <b>1.3</b>      |
| <b>7*</b>             | <b>0.7</b>           | <b>0.6</b>      | <b>0.8</b>      |
| <b>6*</b>             | <b>0.7</b>           | <b>0.7</b>      | <b>0.6</b>      |
| <b>5</b>              | <b>0.2</b>           | <b>0.3</b>      | <b>0.1</b>      |
| <b>4</b>              | <b>0.1</b>           | <b>0.1</b>      | <b>0.2</b>      |
| <b>3</b>              | <b>0.2</b>           | <b>0.3</b>      | <b>0.1</b>      |
| <b>2</b>              | <b>0.2</b>           | <b>0.2</b>      | <b>0.2</b>      |
| <b>1</b>              | <b>0.3</b>           | <b>0.4</b>      | <b>0.3</b>      |

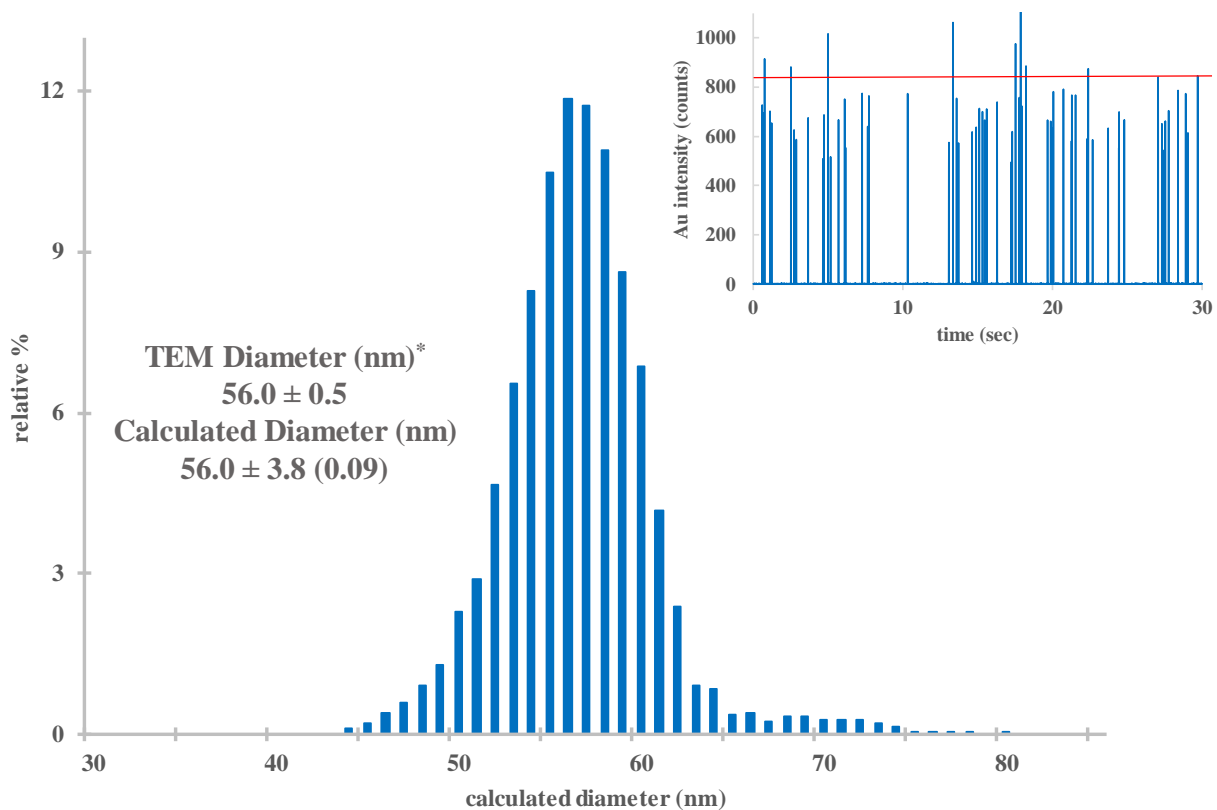

**Figure S1.** Single particle ICP-MS measured size distribution and representative  $^{197}\text{Au}$  time resolved data (inset) of NIST RM 8013 (nominal 60 nm AuNPs). Red bar: average measured particle intensity for 60 nm AuNPs. The uncertainty of the mean value represents one standard deviation. Bin size corresponds to 1 nm. TEM data provided by NIST Report of Investigation for RM 8013.<sup>45</sup>

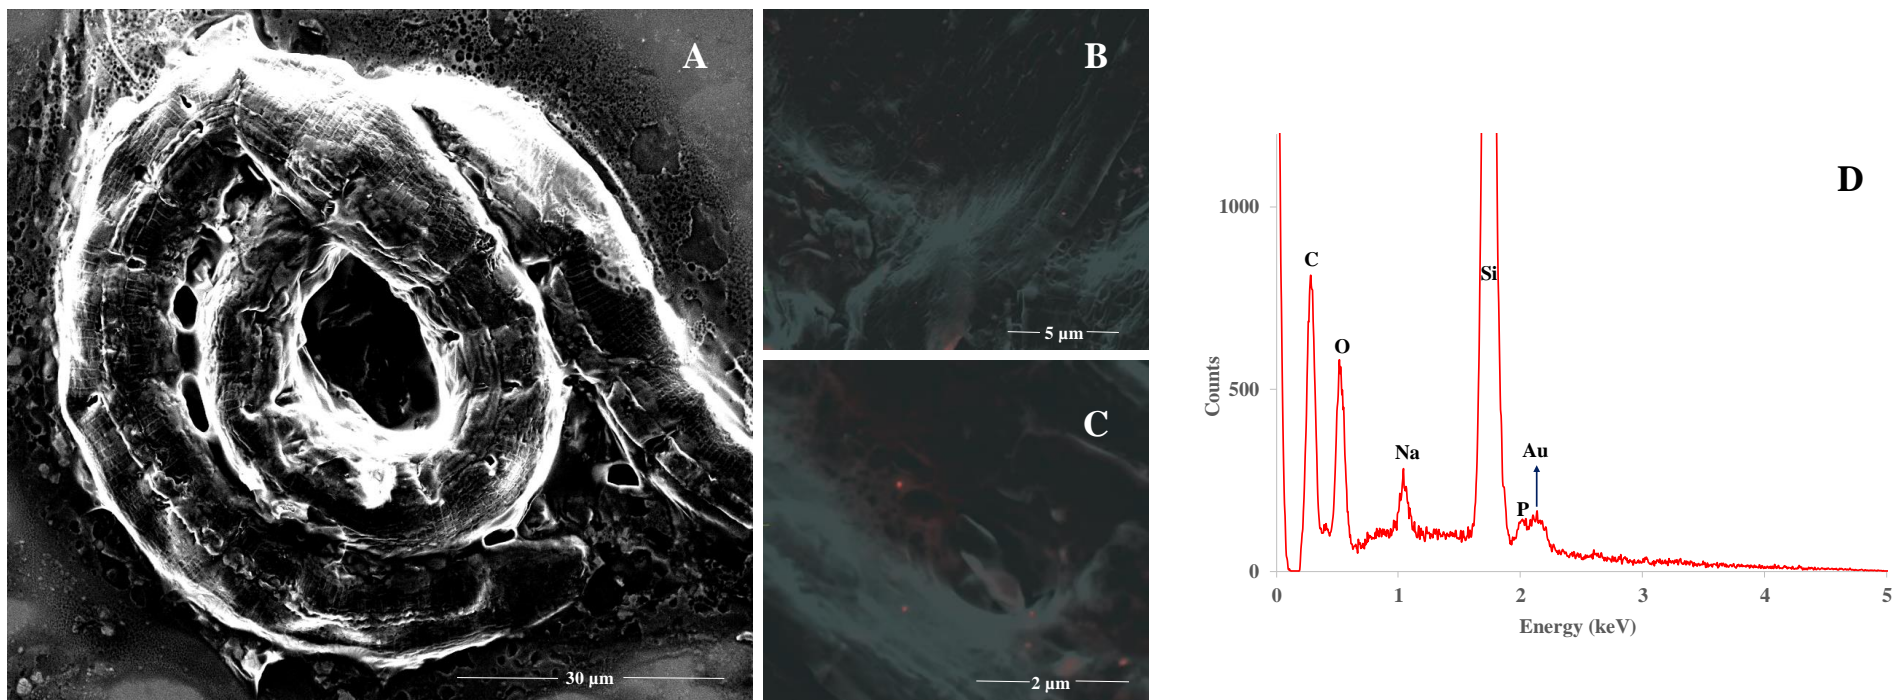

**Figure S2.** (A) High magnification SEM image of a nematode exposed to 60 nm AuNPs, following by sample processing shown in **Scheme 1**. (B,C). Bright red spots on cuticle were examined by EDS where the presence of Au was confirmed. (D) Energy dispersive X-ray spectrum of cuticle displayed in (C). Note the keV peak associated with the presence of elemental Au at 2.12 keV. *scale bars:* (A) 30 μm, (B) 5 μm, (C) 2 μm.

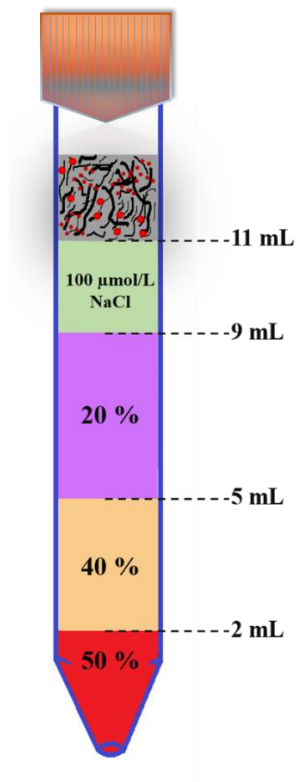

**Figure S3.** The construction of the layers of the sucrose density gradient within the test tube from top to bottom: 2 mL of AuNP-exposed nematode pellet (gray), 2 mL of 100  $\mu\text{mol/L}$  NaCl (light green) + sucrose [4 mL of 20 % (w/v; purple), 3 mL of 40 % (w/v; orange), and 2 mL of 50 % (w/v; red)].



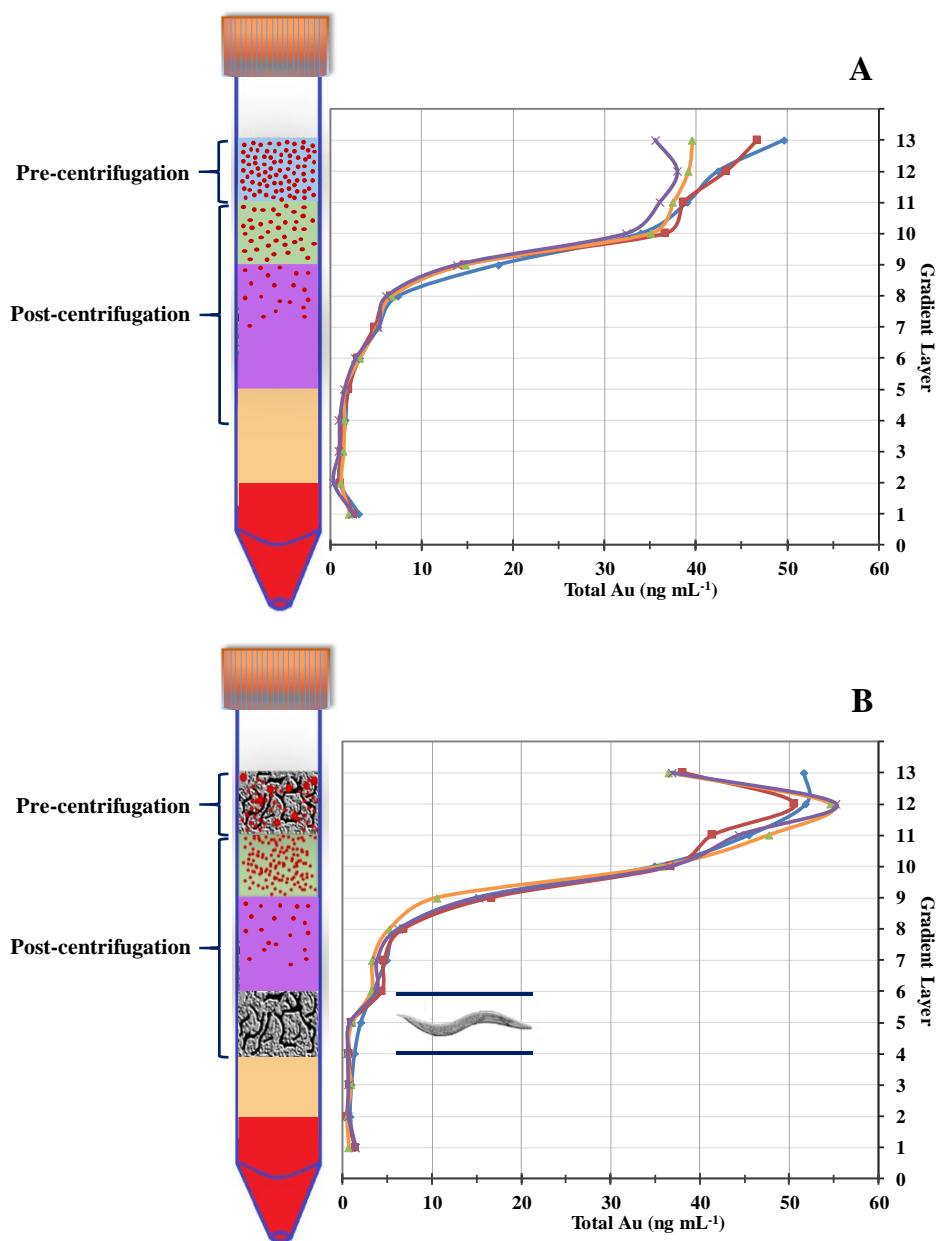

**Figure S4.** (A) Distribution of Au from sucrose density gradient centrifugal separation of a combined mixture of 30 nm and 60 nm AuNPs (NIST). (B) Distribution of Au from sucrose density gradient centrifugal separation following nematode exposure to a mixture of 30 nm and 60 nm AuNPs (NIST). The horizontal blue bars represent the layers that nematodes were located in after centrifugation. The color traces represent four sample replicates where: purple = sample 1, blue = sample 2, magenta = sample 3, and orange = sample 4.

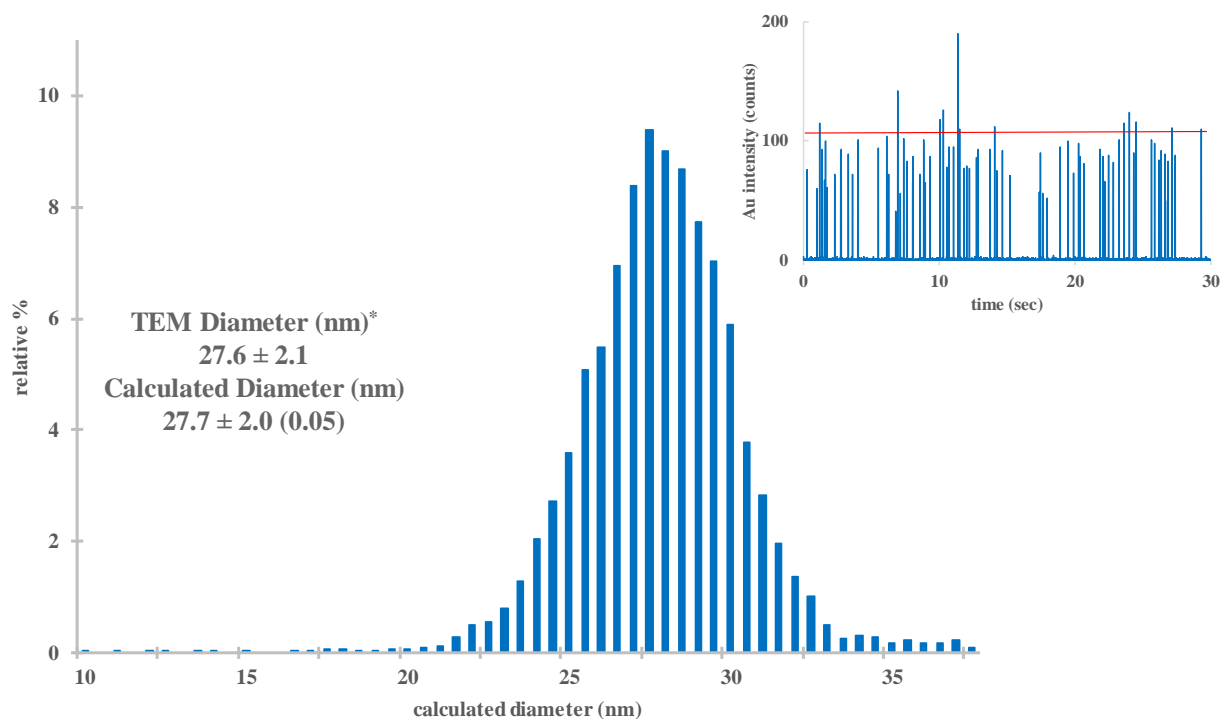

**Figure S5.** Single particle ICP-MS measured size distribution and representative  $^{197}\text{Au}$  time resolved data (inset) of NIST RM 8012 (nominal 30 nm AuNPs). Red bar: average particle intensity for 30 nm AuNPs. The uncertainty of the mean value represents one standard deviation. Bin size corresponds to 0.5 nm. TEM data provided by NIST Report of Investigation for RM 8012.<sup>47</sup>

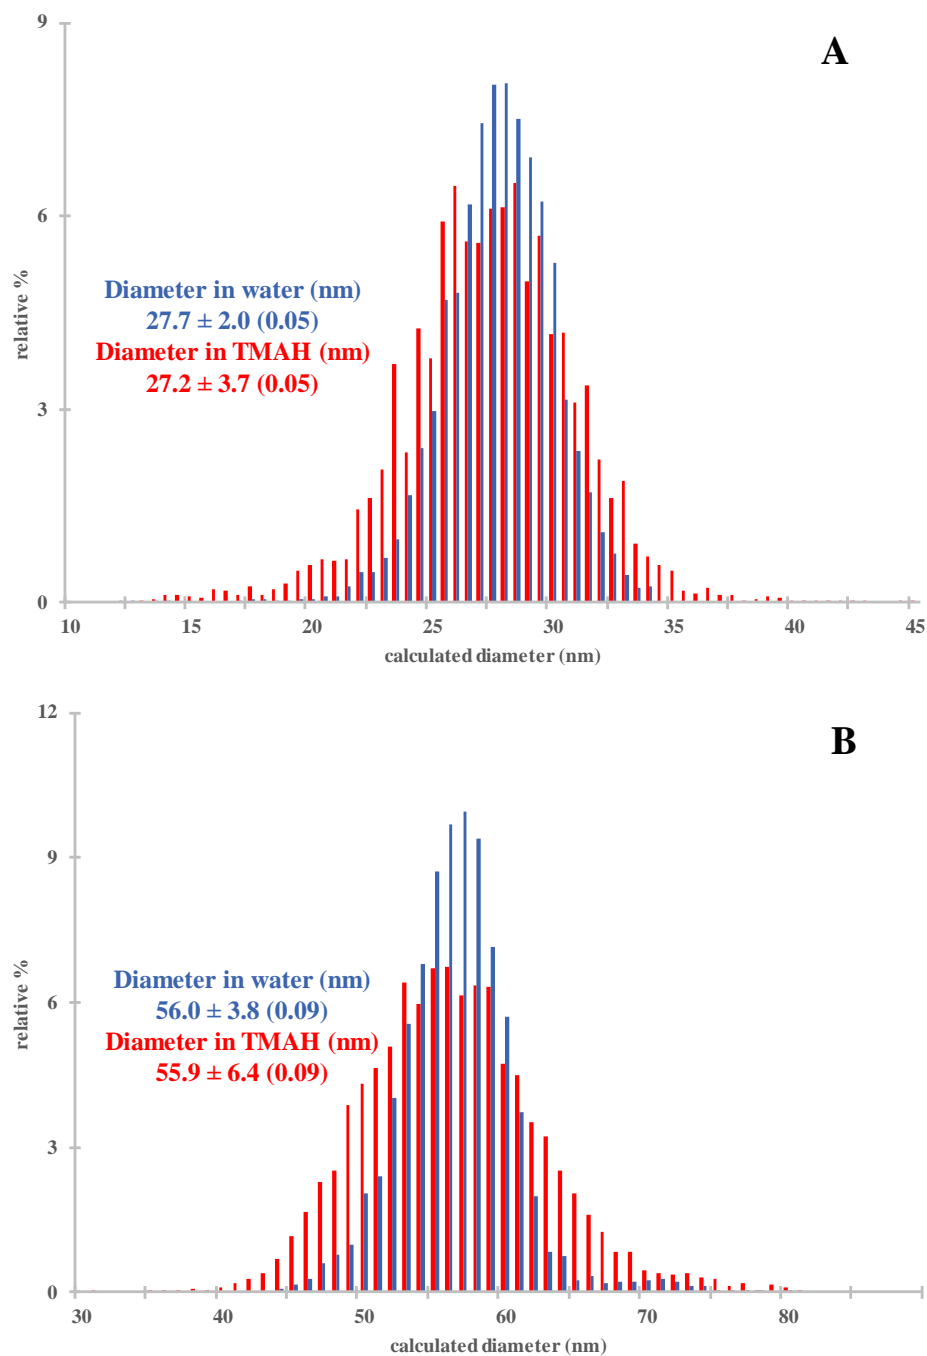

**Figure S6.** Particle size distributions for NIST 30 nm AuNPs (**A**) and NIST 60 nm AuNPs (**B**) in water and after TMAH digestion (to test for matrix interference; TMAH concentration diluted to > 0.1 % volume fraction). Mean diameter is expressed as the mean of the calculated diameter and uncertainties correspond to one standard deviation. Value in parenthesis corresponds to the expanded uncertainties that account only for measurement replication. Bin size corresponds to 0.5 nm for (**A**) and 1 nm for (**B**). TEM data provided by NIST Reports of Investigation for RM 8012 and RM 8013.<sup>44, 46</sup>

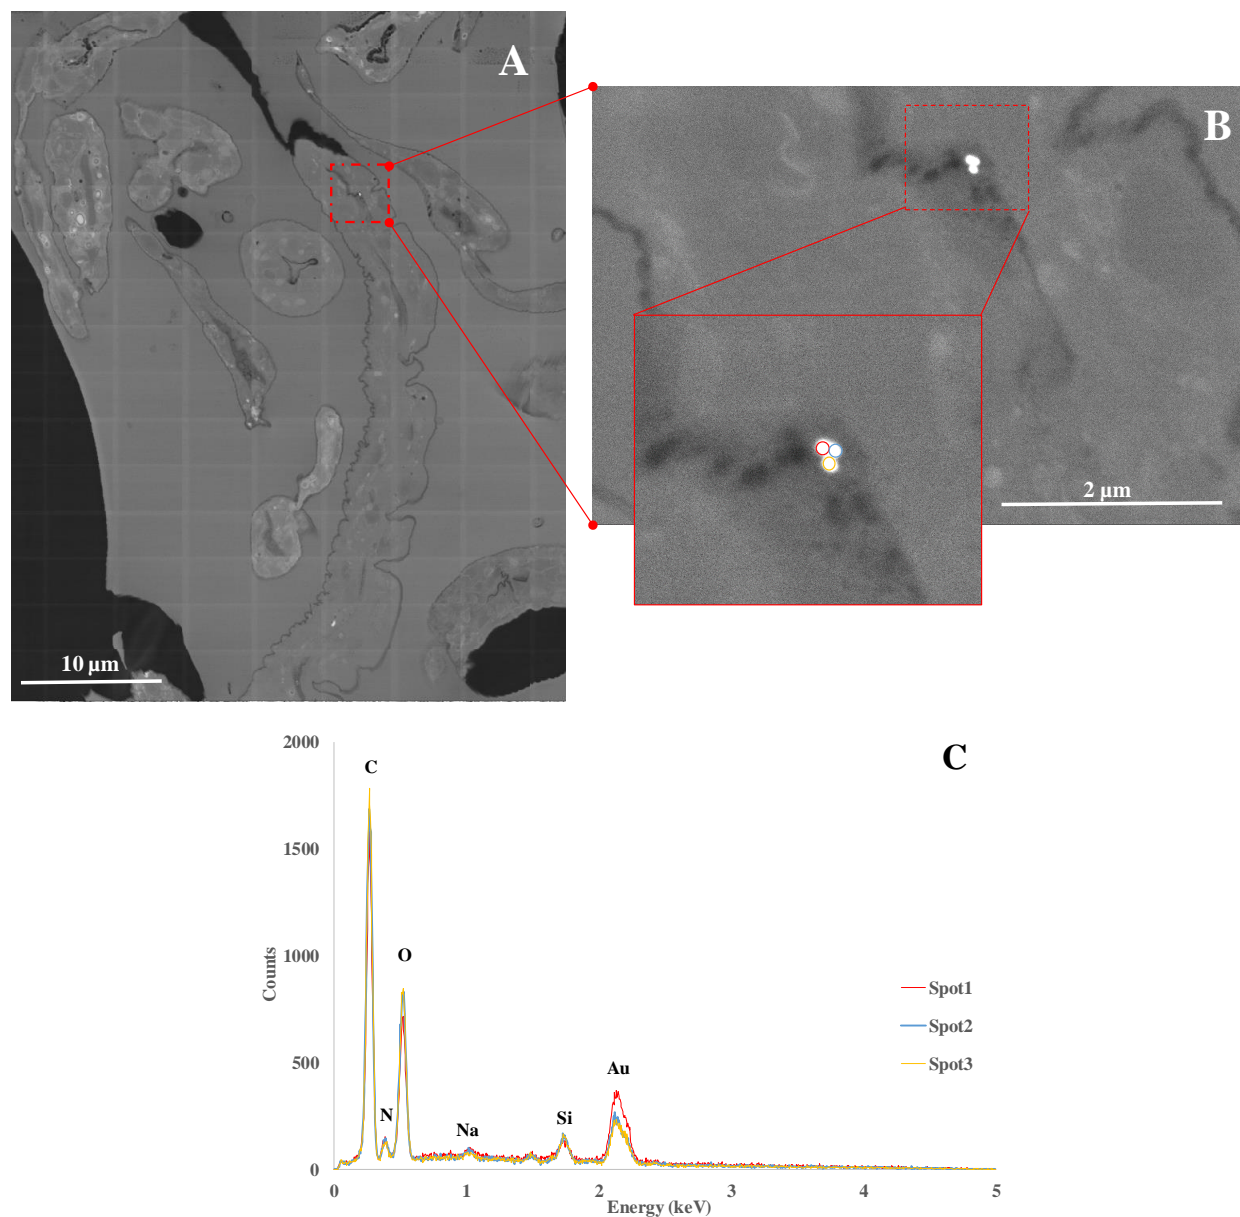

**Figure S7.** (A) SEM image of nematodes exposed to 60 nm AuNPs (LE<sub>x</sub>). Sample was processed using **Scheme 2**. (B) Higher magnification SEM image of red box inset highlighted in (A). (C) Energy dispersive X-ray spectrum of three high contrast areas within the nematode sample. Note the high keV peaks associated with the presence of elemental Au. *scale bars:* (A) 10 μm and (B) 2 μm.

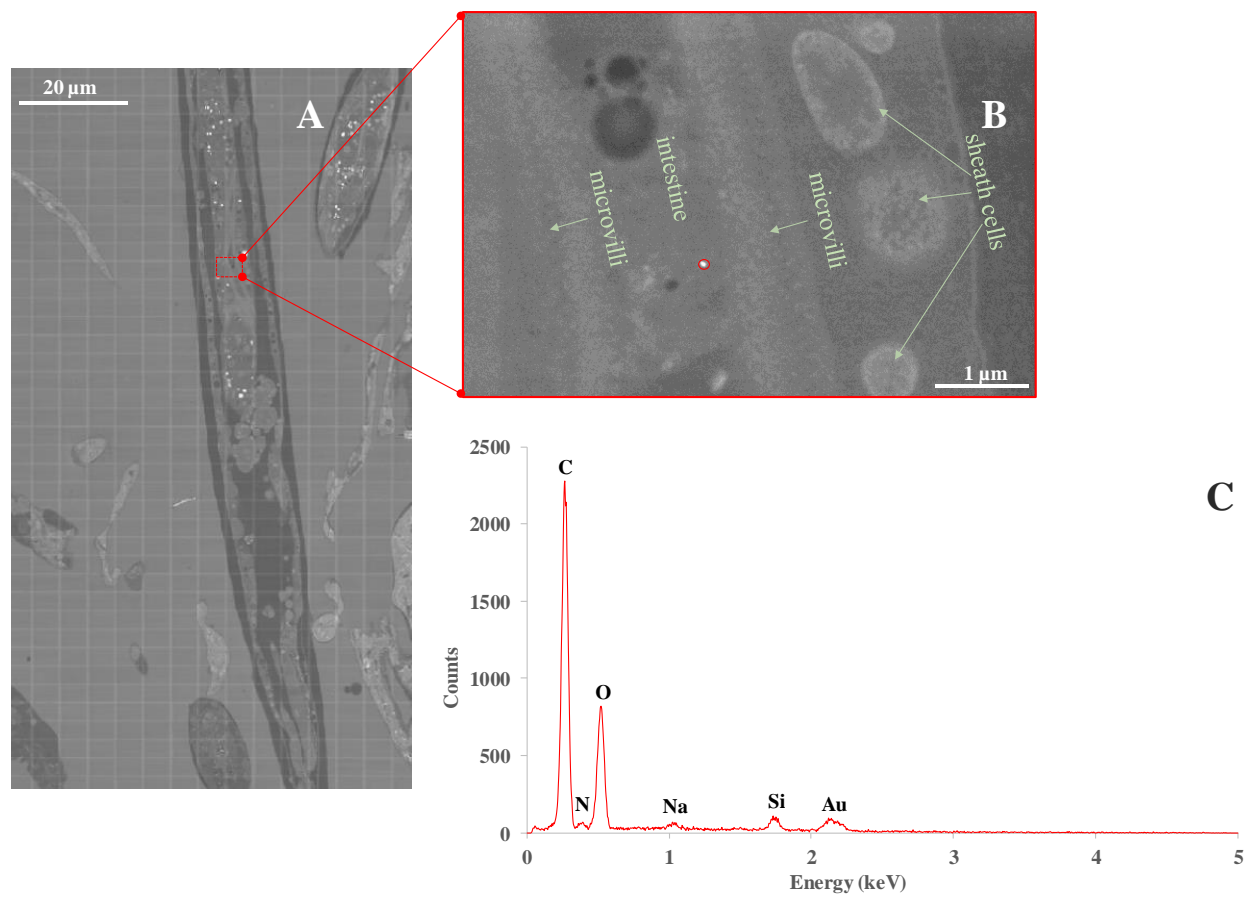

**Figure S8.** (A) SEM image of nematodes exposed to 30 nm AuNPs (HEX). Sample was processed using **Scheme 2**. (B) Higher magnification SEM image of red box inset highlighted in (A). (C) Energy dispersive X-ray spectrum of high contrast area highlighted (red) in (B). Note the high keV peaks at 2.12 associated with the presence of elemental Au. *scale bars:* (A) 20 μm and (B) 1 μm.

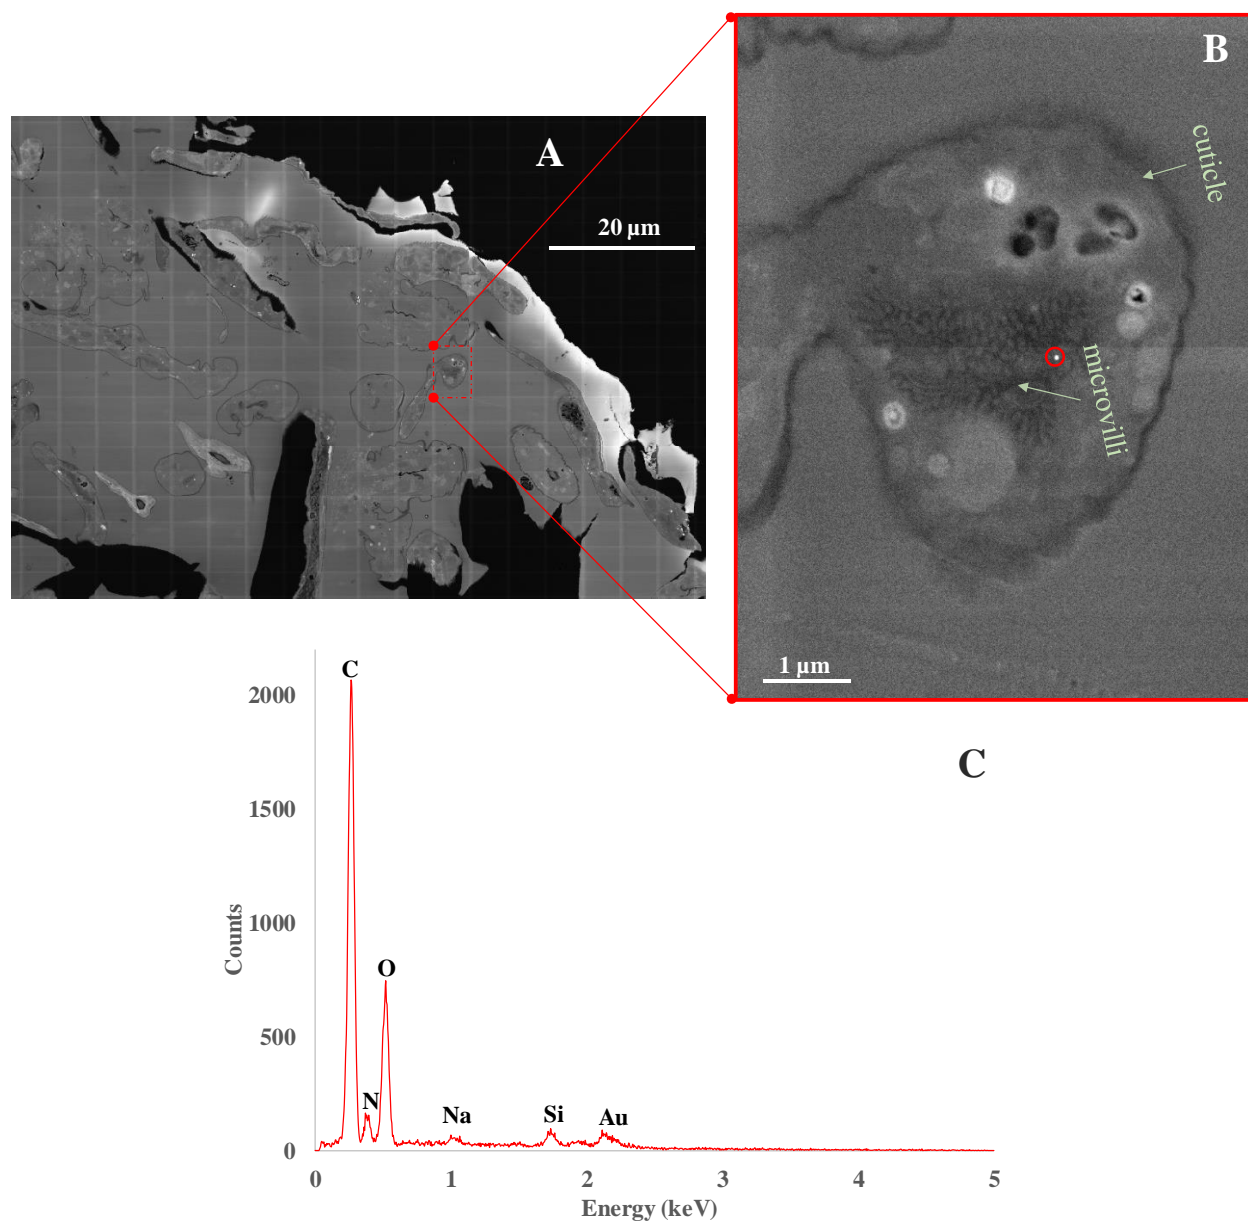

**Figure S9.** (A) SEM image of nematodes exposed to 60 nm AuNPs (LE<sub>x</sub>). Sample was processed using **Scheme 2**. (B) Higher magnification SEM image of red inset highlighted in (A). (C) Energy dispersive X-ray spectrum of high contrast area highlighted in the red circle in (B). Note the high keV peaks at 2.12 associated with the presence of elemental Au. *scale bars: (A) 20 μm and (B) 1 μm.*
